# Supplementary material for: Cyclopropenium ion catalysed Beckmann rearrangement
Source: Royal Society of Chemistry journal article supplement (doi:10.1039/c0cc00815j), 2010-01-01
Supplement: c0cc00815j.pdf [file c0cc00815j.pdf]

## Supplementary Information for

### Cyclopropenium ion catalysed Beckmann rearrangement

Vishnu P. Srivastava, Rajesh Patel, Garima and Lal Dhar S. Yadav\*

*Department of Chemistry, University of Allahabad,  
Allahabad, India-211 002*

E-mail: ldsyadav@hotmail.com

**General Information:** Reagents were obtained from commercial supplier, and used without further purification unless otherwise specified by a reference. The pre-catalyst 3,3-dichloro-1,2-diphenylcyclopropene and ketoximes were prepared from 1,3-diphenylacetone and ketones, respectively following reported procedures.<sup>1,2</sup> Solvents were purified by the usual methods and stored over molecular sieves. All reactions were performed using oven-dried glassware under a nitrogen atmosphere. Organic solutions were concentrated using a Buchi rotary evaporator. Column chromatography was carried out over silica gel (Merck 100–200 mesh) and TLC was performed using silica gel GF254 (Merck) plates. Melting points were determined by open glass capillary method and are uncorrected. IR spectra in KBr were recorded on a Perkin-Elmer 993 IR spectrophotometer, <sup>1</sup>H NMR spectra were recorded on a Bruker AVII 400 spectrometer in CDCl<sub>3</sub>/DMSO-*d*<sub>6</sub> using TMS as internal reference with chemical shift value being reported in ppm. All coupling constants (*J*) are reported in Hertz (Hz). GC-MS were obtained on a Hewlett-Packard model GCD-HP1800A.

#### General Procedure for Cyclopropenium Ion Catalysed Beckmann Rearrangement (Table 2)

To a solution of ketoxime **1** (1 mmol) in dry acetonitrile (3 mL), 3,3-dichloro-1,2-diphenylcyclopropene **2** (3 mol%) and ZnCl<sub>2</sub> (3 mol%) were added at rt and the reaction mixture was heated at reflux under a nitrogen atmosphere. After completion of the

reaction as indicated by TLC, it was quenched with saturated aqueous sodium hydrogen carbonate (10 mL) and extracted with ethyl acetate ( $3 \times 10$  mL). The organic phase was dried over anhydrous magnesium sulfate and concentrated in vacuo to yield the crude product, which was purified by silica gel column chromatography (EtOAc-Hexane) to give the corresponding amide in high yield. The structure of the products was confirmed by comparison of their mp, TLC, IR and  $^1\text{H}$  NMR data with authentic samples obtained commercially or prepared by literature methods.<sup>2-4</sup>

***N*-phenylacetamide (Table 2, Entry 1):** Mp 114-115 °C, (Lit.<sup>4</sup> Mp 114-116 °C), IR (KBr):  $\nu_{\text{max}} = 3304, 3148, 3035, 2935, 2850, 1668, 1597, 1555, 1502, 1435, 1369, 1325, 1265, 755, 695 \text{ cm}^{-1}$ ;  $^1\text{H}$  NMR (400 MHz,  $\text{CDCl}_3$ ):  $\delta = 8.44$  (br, 1H), 7.51 (d,  $J = 8.5$  Hz, 2H), 7.25 (t,  $J = 7.8$  Hz, 2H), 7.03 (t,  $J = 7.2$  Hz, 1H), 2.09 (s, 3H).

***N*-(2-methoxyphenyl)acetamide (Table 2, Entry 2):** Mp 85-87 °C, (Lit.<sup>4</sup> Mp 85-86 °C), IR (KBr):  $\nu_{\text{max}} = 3252, 2980, 2865, 1657, 1541, 1495, 1457, 1252, 1025, 750 \text{ cm}^{-1}$ ;  $^1\text{H}$  NMR (400 MHz,  $\text{CDCl}_3$ ):  $\delta = 8.36$  (dd,  $J = 1.8, 7.8$  Hz, 1H), 7.77 (br, 1H), 7.08-6.91 (m, 2H), 6.87 (dd,  $J = 1.8, 8.1$  Hz, 1H), 3.88 (s, 3H), 2.21 (s, 3H).

***N*-(3-methoxyphenyl)acetamide (Table 2, Entry 3):** Mp 86-88 °C, (Lit.<sup>4</sup> Mp 87-88 °C), IR (KBr):  $\nu_{\text{max}} = 3257, 2973, 2867, 2853, 1664, 1606, 1560, 1494, 1415, 1268, 1051, 860, 765, 689 \text{ cm}^{-1}$ ;  $^1\text{H}$  NMR (400 MHz,  $\text{CDCl}_3$ ):  $\delta = 7.77$  (br, 1H), 7.29-7.17 (m, 2H), 6.94 (d,  $J = 8.0$  Hz, 1H), 6.63 (dd,  $J = 2.1, 8.1$  Hz, 1H), 3.80 (s, 3H), 2.17 (s, 3H).

***N*-(4-methoxyphenyl)acetamide (Table 2, Entry 4):** Mp 129-131 °C, (Lit.<sup>4</sup> Mp 129-130 °C), IR (KBr):  $\nu_{\text{max}} = 3255, 2976, 2859, 1655, 1604, 1549, 1513, 1245, 1030, 835 \text{ cm}^{-1}$ ;  $^1\text{H}$  NMR (400 MHz,  $\text{CDCl}_3$ ):  $\delta = 7.38$  (d,  $J = 9.0$  Hz, 2H), 7.06 (br, 1H), 6.84 (d,  $J = 9.0$  Hz, 2H), 3.80 (s, 3H), 2.15 (s, 3H).

***N*-(2-chlorophenyl)acetamide (Table 2, Entry 5):** Mp 90-91 °C, (Lit.<sup>4</sup> Mp 90-91 °C), IR (KBr):  $\nu_{\text{max}} = 3302, 2974, 2820, 1656, 1600, 1547, 1510, 1415, 1249, 1045, 765 \text{ cm}^{-1}$ ;

$^1\text{H}$  NMR (400 MHz,  $\text{CDCl}_3$ ):  $\delta$  = 8.34 (d,  $J$  = 8.0 Hz, 1H), 7.65 (bs, 1H), 7.35 (dd,  $J$  = 8.0 Hz; 1.5 Hz, 1H), 7.28-7.24 (m, 1H), 7.03 (t,  $J$  = 7.2 Hz, 1H), 2.23 (s, 3H).

***N*-phenylpropionamide (Table 2, Entry 6):** Mp 102-103 °C, (Lit.<sup>4</sup> Mp 103-104 °C), IR (KBr):  $\nu_{\text{max}}$  = 3304, 3148, 3035, 2945, 2865, 1667, 1595, 1554, 1455, 1369, 1327, 1263, 735, 695  $\text{cm}^{-1}$ ;  $^1\text{H}$  NMR (400 MHz,  $\text{CDCl}_3$ ):  $\delta$  = 7.82 (br, 1H), 7.54 (d,  $J$  = 8.0 Hz, 2H), 7.28 (t,  $J$  = 7.5, 8.5 Hz, 2H), 7.10 (t,  $J$  = 7.5, 7.0 Hz, 1H), 2.35 (q,  $J$  = 7.5 Hz, 2H), 1.22 (t,  $J$  = 7.5 Hz, 3H).

***N*-(2-naphthyl)acetamide (Table 2, Entry 7):** Mp 132-134 °C, (Lit.<sup>8</sup> Mp 133-135 °C), IR (KBr):  $\nu_{\text{max}}$  = 3287, 1669, 1590, 1562, 1470, 1395, 1350, 1279, 856, 745  $\text{cm}^{-1}$ ;  $^1\text{H}$  NMR (400 MHz,  $\text{CDCl}_3$ ):  $\delta$  = 8.18 (br, 1H), 7.76–7.80 (m, 4H), 7.40–7.46 (m, 3H), 2.24 (s, 3H).

***N*-phenylbenzamide (Table 2, Entry 8)** Mp 162-163 °C, (Lit.<sup>3</sup> Mp 164-165 °C), IR (KBr):  $\nu_{\text{max}}$  = 3298, 3075, 3029, 1674, 1556, 1446, 735  $\text{cm}^{-1}$ ;  $^1\text{H}$  NMR (400 MHz,  $\text{CDCl}_3$ ):  $\delta$  = 7.91 (bs, 1H), 7.85-7.83 (m, 2H), 7.62 (d,  $J$  = 7.9 Hz, 2H), 7.54-7.49 (m, 1H), 7.46-7.43 (m, 2H), 7.37-7.31 (m, 2H), 7.14-7.11 (m, 1H).

***N*-(4-fluorophenyl)benzamide and 4-fluoro-*N*-phenylbenzamide (Table 2, entry 9):** Mp 168-180 °C, (Lit.<sup>4</sup> Mp 167-178 °C), IR (KBr):  $\nu_{\text{max}}$  = 3290, 3071, 3032, 1680, 1617, 1558, 1506, 1235, 837  $\text{cm}^{-1}$ ;  $^1\text{H}$  NMR (400 MHz,  $\text{DMSO}-d_6$ ):  $\delta$  = 10.32 (bs, 1H), 10.27 (bs, 1H), 8.07-8.02 (m, 2H), 7.96 (d,  $J$  = 7.0 Hz, 2H), 7.83-7.81 (m, 1H), 7.79-7.76 (m, 3H), 7.61-7.58 (m, 1H), 7.56-7.51 (m, 2H), 7.39-7.34 (m, 4H), 7.20 (t,  $J$  = 9.0 Hz, 2H), 7.13-7.09 (m, 1H).

***N*-(4-methoxyphenyl)benzamide and 4-methoxy-*N*-phenylbenzamide (Table 2, entry 10):** Mp 147-158 °C, (Lit.<sup>4</sup> Mp 148-161 °C), IR (KBr):  $\nu_{\text{max}}$  = 3292, 3024, 1669, 1605, 1558, 1502, 1415, 1270, 1057, 854, 752  $\text{cm}^{-1}$ ;  $^1\text{H}$  NMR (400 MHz,  $\text{DMSO}-d_6$ ):  $\delta$  = 10.15 (bs, 1H), 10.10 (br, 1H), 7.99-7.95 (m, 3H), 7.78 (d,  $J$  = 8.0 Hz, 2H), 7.70 (d,  $J$  = 9.0 Hz,

2H), 7.59-7.50 (m, 2H), 7.54-7.50 (m, 3H), 7.34 (t,  $J = 8.0$  Hz, 2H), 7.07 (d,  $J = 9.0$  Hz, 2H), 6.94 (d,  $J = 9.0$  Hz, 2H), 3.84 (s, 3H), 3.75 (s, 3H).

***N*-benzyl-2-phenylacetamide (Table 2, Entry 11):** Mp 68 °C, (Lit.<sup>5</sup> Mp 68 °C), IR (KBr):  $\nu_{\max} = 3292, 3024, 1669, 1605, 1558, 1502, 1415, 1270, 1057, 854, 752$  cm<sup>-1</sup>; <sup>1</sup>H NMR (400 MHz, CDCl<sub>3</sub>):  $\delta = 7.31-7.34$  (m, 2H), 7.21-7.29 (m, 6H), 7.14-7.17 (m, 2H), 5.80 (s, 1H), 4.38 (d,  $J = 5.9$  Hz, 2H), 3.59 (s, 2H).

***N*-isopropylisobutyramide (Table 2, entry 12):** Mp 101-102 °C, (Lit.<sup>7</sup> Mp 103-104 °C), IR (KBr):  $\nu_{\max} = 3297, 2970, 2933, 2874, 1645, 1551, 1366, 1243, 1095, 699$  cm<sup>-1</sup>; <sup>1</sup>H NMR (400 MHz, CDCl<sub>3</sub>):  $\delta = 6.23$  (br, 1H), 4.01-4.11 (m, 1H), 2.28 (septet,  $J = 6.9$  Hz, 1H), 1.15 (d,  $J = 6.9$  Hz, 12H).

***N*-octylacetamide (Table 2, entry 13)<sup>2</sup>:** IR (film):  $\nu_{\max} = 3272, 2970, 2925, 2869, 1641, 1554, 1229, 1141, 1045, 723$  cm<sup>-1</sup>; <sup>1</sup>H NMR (400 MHz, CDCl<sub>3</sub>):  $\delta = 5.97$  (br, 1H), 3.21-3.26 (m, 2H), 1.96 (s, 3H), 1.45-1.52 (m, 2H), 1.29 (br, 10H), 0.93 (t,  $J = 6.9$  Hz, 3H).

**Azacyclotridecan-2-one (Table 2, entry 14):** Mp 149-153 °C, (Lit.<sup>5</sup> Mp 151.5 °C), IR (KBr):  $\nu_{\max} = 3301, 2932, 2855, 1640, 1547, 1449, 1060$  cm<sup>-1</sup>; <sup>1</sup>H NMR (400 MHz, CDCl<sub>3</sub>):  $\delta = 6.02$  (br, 1H), 3.29 (dd,  $J = 6.1, 10.6$  Hz, 2H), 2.16-2.18 (m, 2H), 1.63-1.67 (m, 2H), 1.45-1.47 (m, 2H), 1.33 (br, 14H).

**Azacycloundecan-2-one (Table 2, entry 15):** Mp 161-162 °C, (Lit.<sup>6</sup> Mp 163-164 °C), IR (KBr):  $\nu_{\max} = 3309, 2932, 2859, 1638, 1552, 1462, 689$  cm<sup>-1</sup>; <sup>1</sup>H NMR (400 MHz, CDCl<sub>3</sub>):  $\delta = 6.01$  (br, 1H), 3.34 (dd,  $J = 5.6, 10.9$  Hz, 2H), 2.18-2.22 (m, 2H), 1.33-1.78 (m, 14H).

**Azacyclononan-2-one (Table 2, entry 16):** Mp 75-76 °C, (Lit.<sup>5</sup> Mp 74-76 °C), IR (KBr):  $\nu_{\max} = 3315, 2930, 2864, 1646, 1541, 1445, 1035, 796, 732$  cm<sup>-1</sup>; <sup>1</sup>H NMR (400 MHz, CDCl<sub>3</sub>):  $\delta = 5.99$  (br, 1H), 3.35 (m, 2H), 2.45 (t,  $J = 6.4$  Hz, 2H), 1.80-1.87 (m, 2H), 1.57-1.62 (m, 8H).

**$\epsilon$ -Caprolactam (Table 2, entry 17):** Mp 69-71 °C, (Lit.<sup>4</sup> Mp 70-71 °C), IR (KBr):  $\nu_{\max}$  = 3295, 3078, 2930, 2856, 1675, 1486, 1435, 1365, 1198, 1125, 823  $\text{cm}^{-1}$ ;  $^1\text{H}$  NMR (400 MHz,  $\text{CDCl}_3$ ):  $\delta$  = 6.10 (br, 1H), 3.21 (t,  $J$  = 6.3 Hz, 2H), 2.48 (t,  $J$  = 5.8 Hz, 2H), 1.60-1.80 (m, 6H).

**References:**

1. B. D. Kelly and T. H. Lambert, *J. Am. Chem. Soc.*, 2009, **131**, 13930.
2. Y. Furuya, K. Ishihara and H. Yamamoto, *J. Am. Chem. Soc.*, 2005, **127**, 11240.
3. H.-J. Pi, J.-D. Dong, N. An, W. Du and W.-P. Deng, *Tetrahedron*, 2009, **65**, 7790.
4. C. Ramalingan and Y.-T. Park, *J. Org. Chem.*, 2007, **72**, 4536.
5. *CRC Handbook of Chemistry and Physics*, 87th ed.; D. R. Lide, Ed.; CRC Press, 2006.
6. *CRC Handbook of Data on Organic Compounds*, III ed. Vol VII; D. R. Lide, and G. W. A. Milne Ed.; CRC Press, 2000.
7. M. Sprecher and D. Kost, *J. Am. Chem. Soc.*, 1994, **116**, 1016.
8. W. k. Su., Y. Zhang, J. J. Li, and P. Li, *Org. Prep. Proced. Int.* 2004, **36**, 383.
